# Supplementary material for: Green Roof Substrate Microbes: Stress-Tolerant Communities Characterized by the Aeromicrobiome?
Source: Preprints.org preprint supplement (doi:10.20944/preprints202403.1784.v1), 2024-03-28
Supplement: Supplementary file 1 [file supplementary]

Supplementary Materials


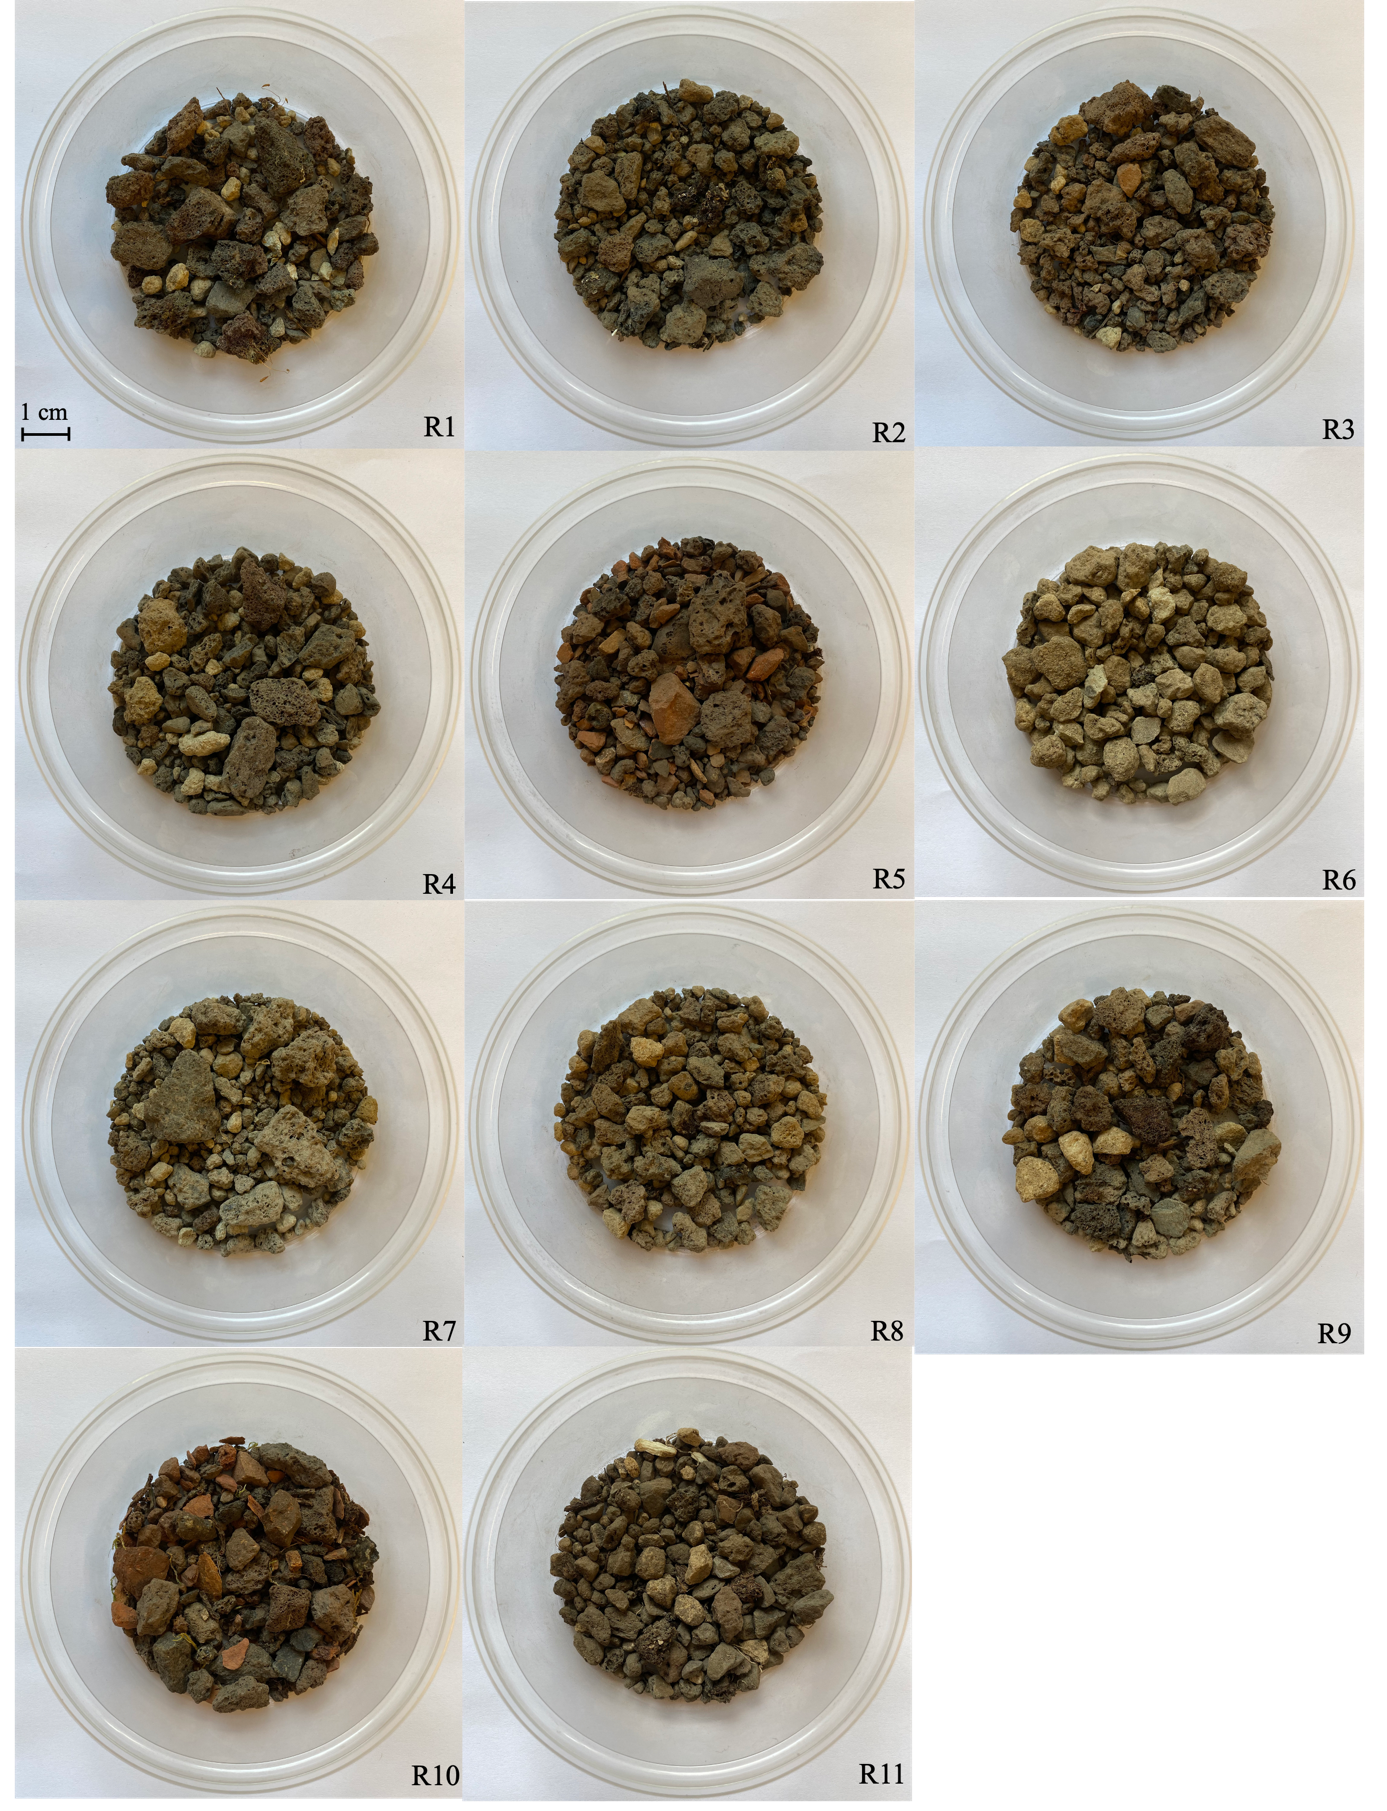


**Figure S1.** An overview of the substrate textures from every investigated green roof.

**Figure S2.** Rarefaction curves. Prokaryotic samples are rarefied to 4,352 reads (a). Fungal samples are rarefied to 2,331 reads (b).

**Table S1.** A list of the plant species that are identified on every green roof during four occasions in the growth season (May, June, August and September 2019). An x denotes the presence of the respective species.

| Family | Species | R1 | R2 | R3 | R4 | R5 | R6 | R7 | R8 | R9 | R10 | R11 |
| --- | --- | --- | --- | --- | --- | --- | --- | --- | --- | --- | --- | --- |
| Alliaceae | *Allium schoenoprasum* | x |  |  |  |  | x | x |  |  |  | x |
| Alliaceae | *Allium sphaerocephalon* |  |  |  |  |  |  |  |  |  |  | x |
| Amaranthaceae | *Chenopodium album* |  |  |  |  | x |  |  |  |  | x |  |
| Amaranthaceae | *Chenopodium polyspermum* |  |  | x |  |  |  |  |  |  |  |  |
| Apiaceae | *Daucus carota* |  |  |  |  |  |  |  |  |  | x |  |
| Asteraceae | *Achillea millefolium* |  |  |  |  |  | x |  |  |  |  |  |
| Asteraceae | *Anthemis tinctoria* | x |  | x |  |  |  |  |  |  |  |  |
| Asteraceae | *Calendula arvensis* | x |  |  |  |  |  |  |  |  |  |  |
| Asteraceae | *Cirsium dissectum* |  |  | x |  |  |  |  |  |  |  |  |
| Asteraceae | *Conyza canadensis* |  |  |  |  |  | x |  |  |  |  |  |
| Asteraceae | *Conyza sumatrensis* |  |  | x |  |  |  |  |  |  |  |  |
| Asteraceae | *Crepis capillaris* |  | x |  |  |  |  | x |  |  |  |  |
| Asteraceae | *Erigeron canadensis* | x | x | x | x | x |  | x | x | x | x | x |
| Asteraceae | *Galinsoga quadriradiata* | x |  |  |  | x | x |  |  |  |  |  |
| Asteraceae | *Gnaphalium luteoalbum* | x |  |  |  |  |  |  |  |  |  | x |
| Asteraceae | *Hypochaeris radicata* | x |  | x | x | x | x | x | x | x |  |  |
| Asteraceae | *Jacobaea vulgaris* |  |  |  |  |  |  |  |  |  |  | x |
| Asteraceae | *Lactuca serriola* |  |  | x |  |  |  |  |  |  |  | x |
| Asteraceae | *Mycelis muralis* |  |  |  |  |  |  | x |  | x |  |  |
| Asteraceae | *Picris hieracioides* |  | x |  |  |  |  |  |  |  |  |  |
| Asteraceae | *Pilosella officinarum* | x |  | x |  | x |  |  |  |  |  |  |
| Asteraceae | *Senecio inaequidens* |  | x |  | x |  | x | x | x | x | x | x |
| Asteraceae | *Senecio vulgaris* | x |  | x | x | x | x | x | x | x | x | x |
| Asteraceae | *Sonchus asper* |  |  |  |  | x |  | x | x |  |  | x |
| Asteraceae | *Sonchus oleraceus* | x | x | x | x | x | x | x | x | x | x | x |
| Asteraceae | *Taraxacum palustre* |  | x |  |  |  |  |  |  |  |  |  |
| Asteraceae | *Tragopogon dubius* |  |  |  |  |  |  |  |  |  | x |  |
| Boraginaceae | *Anchusa officinalis* |  |  | x |  |  |  |  |  |  |  |  |
| Boraginaceae | *Echium vulgare* |  |  |  |  | x |  | x |  | x |  |  |
| Boraginaceae | *Myosotis arvensis* | x |  |  |  |  |  |  |  |  |  |  |
| Brassicaceae | *Alyssum alyssoides* | x |  |  |  | x |  |  |  |  |  |  |
| Brassicaceae | *Barbarea vulgaris* | x | x |  |  |  |  |  |  |  |  |  |
| Brassicaceae | *Capsella bursa-pastoris* |  |  |  |  |  |  |  |  |  | x |  |
| Caryophyllaceae | *Arenaria serpyllifolia* | x |  |  |  |  |  | x |  |  | x |  |
| Caryophyllaceae | *Cerastium glomeratum* |  |  |  |  |  | x |  | x | x |  |  |
| Caryophyllaceae | *Dianthus armeria* | x |  | x |  |  |  |  |  |  |  |  |
| Caryophyllaceae | *Dianthus carthusianorum* | x |  |  |  |  |  | x |  |  |  | x |
| Caryophyllaceae | *Dianthus deltoides* |  |  | x |  |  |  |  |  |  |  |  |
| Caryophyllaceae | *Petrorhagia prolifera* | x |  | x |  | x |  |  |  |  | x |  |
| Caryophyllaceae | *Silene vulgaris* | x |  | x |  | x |  |  |  |  |  |  |
| Caryophyllaceae | *Stellaria media* |  |  |  |  | x |  |  |  |  |  |  |
| Crassulaceae | *Sedum acre* | x |  |  |  | x |  |  | x | x |  |  |
| Crassulaceae | *Sedum album* | x | x |  | x | x | x | x | x | x | x | x |
| Crassulaceae | *Sedum forsterianum* |  |  |  |  |  |  |  |  |  |  | x |
| Crassulaceae | *Sedum hispanicum* | x | x | x | x | x | x |  |  | x | x | x |
| Crassulaceae | *Sedum hybridum* | x | x | x | x | x | x | x | x | x |  | x |
| Crassulaceae | *Sedum kamtschaticum* | x | x |  | x |  |  | x |  |  |  | x |
| Crassulaceae | *Sedum oregonense* |  |  |  |  |  |  |  |  |  |  | x |
| Crassulaceae | *Sedum rupestre* | x | x | x |  | x |  | x | x |  | x |  |
| Crassulaceae | *Sedum sexangulare* | x | x | x |  | x | x | x | x | x | x | x |
| Crassulaceae | *Sedum spurium* | x | x | x | x | x | x | x | x | x | x | x |
| Euphorbiaceae | *Euphorbia cyparissias* | x |  | x |  |  |  |  |  |  |  |  |
| Euphorbiaceae | *Euphorbia peplus* |  |  | x | x | x |  |  |  |  |  |  |
| Fabaceae | *Lupinus polyphyllus* | x |  |  |  |  |  |  |  |  |  |  |
| Fabaceae | *Medicago minima* | x |  |  |  |  |  |  |  |  |  |  |
| Fabaceae | *Melilotus albus* |  |  |  | x |  |  | x |  |  |  |  |
| Fabaceae | *Trifolium arvense* |  | x | x | x |  |  |  |  | x | x |  |
| Fabaceae | *Trifolium dubium* |  | x | x | x | x |  | x |  |  | x |  |
| Fabaceae | *Trifolium repens* |  |  |  | x |  |  |  |  |  |  |  |
| Geraniaceae | *Erodium cicutarium* | x |  | x | x |  |  |  |  |  |  | x |
| Geraniaceae | *Geranium molle* |  |  |  | x | x |  |  | x |  | x | x |
| Geraniaceae | *Geranium purpureum* | x |  |  |  | x |  | x |  |  | x |  |
| Geraniaceae | *Geranium pusillum* |  |  |  |  | x |  | x |  |  |  | x |
| Geraniaceae | *Geranium robertianum* |  |  | x | x |  |  |  |  |  |  |  |
| Hypericaceae | *Hypericum perforatum* |  | x |  |  |  | x | x |  |  |  |  |
| Juncaceae | *Juncus effusus* |  |  | x |  |  |  |  |  |  |  |  |
| Lamiaceae | *Clinopodium acinos* |  |  |  |  | x |  |  |  |  |  |  |
| Lamiaceae | *Origanum vulgare* | x |  | x |  | x |  |  |  |  |  |  |
| Lamiaceae | *Prunella vulgaris* |  |  | x |  |  |  |  |  |  |  |  |
| Lamiaceae | *Thymus pulegioides* |  |  | x |  | x | x |  |  |  |  |  |
| Lamiaceae | *Thymus serpyllum* |  |  | x |  |  |  |  |  |  |  |  |
| Lamiaceae | *Thymus vulgaris* |  |  |  |  |  |  | x |  |  |  |  |
| Leguminosae | *Vicia hirsuta* |  |  |  | x | x | x | x | x |  | x |  |
| Leguminosae | *Vicia sativa* |  |  |  |  |  |  |  |  |  | x |  |
| Leguminosae | *Vicia tetrasperma* |  |  |  |  |  |  | x |  |  |  |  |
| Linaceae | *Linum austriacum* | x |  |  |  |  |  |  |  |  |  |  |
| Montiaceae | *Claytonia perfoliata* |  |  |  |  |  |  |  | x |  |  |  |
| Onagraceae | *Epilobium tetragonum* |  |  |  |  |  | x |  |  |  |  | x |
| Papaveraceae | *Papaver argemone* | x |  |  |  | x |  |  |  |  |  |  |
| Plantaginaceae | *Chaenorhinum minus* |  |  |  |  | x | x | x |  |  |  |  |
| Plantaginaceae | *Cymbalaria muralis* |  |  | x |  |  |  |  |  |  |  |  |
| Plantaginaceae | *Linaria vulgaris* |  |  | x |  | x | x |  |  |  | x |  |
| Plantaginaceae | *Plantago major* |  |  | x |  |  |  |  |  |  |  |  |
| Plantaginaceae | *Veronica arvensis* | x |  |  | x | x | x | x |  |  |  | x |
| Poaceae | *Bromus sterilis* |  | x |  |  |  |  |  |  |  |  |  |
| Poaceae | *Bromus tectorum* |  |  |  |  | x |  |  |  |  |  |  |
| Poaceae | *Calamagrostis epigejos* |  | x |  |  |  |  |  |  |  |  |  |
| Poaceae | *Cynodon dactylon* |  |  |  |  | x |  |  |  |  |  |  |
| Poaceae | *Festuca filiformis* |  |  |  |  | x | x | x | x |  | x | x |
| Poaceae | *Festuca rubra* | x | x | x | x | x | x |  |  |  |  |  |
| Poaceae | *Holcus lanatus* | x | x |  |  |  | x |  |  |  |  |  |
| Poaceae | *Hordeum vulgare* |  |  |  |  |  |  |  |  |  | x |  |
| Poaceae | *Lolium perenne* |  | x |  |  |  |  |  |  |  |  |  |
| Poaceae | *Molinia caerulea* |  |  |  |  |  |  |  |  | x |  |  |
| Poaceae | *Phalaris arundinacea* |  |  |  |  |  |  | x |  |  |  |  |
| Poaceae | *Poa annua* |  |  |  |  |  | x |  |  |  |  | x |
| Poaceae | *Vulpia myuros* |  |  |  |  |  |  |  |  |  | x |  |
| Polygonaceae | *Fagopyrum esculentum* |  |  | x |  |  |  |  |  |  |  |  |
| Polygonaceae | *Rumex acetosella* | x |  |  |  |  |  |  |  |  |  |  |
| Ranunculaceae | *Nigella arvensis* |  |  |  |  | x |  |  |  |  |  |  |
| Rosaceae | *Potentilla erecta* |  |  | x |  | x |  | x |  |  |  |  |
| Rosaceae | *Sanguisorba minor* |  |  |  |  | x |  | x |  |  |  |  |
| Rubiaceae | *Galium verum* | x |  |  |  |  |  |  |  |  |  |  |
| Scrophulariaceae | *Verbascum densiflorum* |  |  |  |  | x |  |  |  |  |  |  |
| Scrophulariaceae | *Verbascum thapsus* |  |  |  |  |  |  |  |  |  | x |  |
| Solanaceae | *Solanum americanum* |  |  |  |  | x |  |  |  |  | x |  |
| Verbenaceae | *Verbena bonariensis* |  |  |  |  |  |  |  |  |  |  |  |
| Violaceae | *Viola arvensis* |  |  |  | x |  |  | x |  |  |  | x |
